# Supplementary material for: Evaluation of the effects of newly synthesized metallophthalocyanines on breast cancer cell lines with photodynamic therapy
Source: Royal Society of Chemistry journal article supplement (doi:10.1039/d2dt01912d), 2022-01-01
Supplement: d2dt01912d1.pdf [file d2dt01912d1.pdf]

## Evaluation of the effects of newly synthesized metallophthalocyanines on breast cancer cell lines with photodynamic therapy

Hayrani Eren Bostancı<sup>a</sup>, Ahmet T. Bilgiçli<sup>b\*</sup>, Emre Güzel<sup>c</sup>, Armağan Günsel<sup>b</sup>,  
Ceylan Özsoy Hepokur<sup>a\*</sup>, Behzat Çimen<sup>d</sup>, M. Nilufer Yarasır<sup>b</sup>

<sup>a</sup>*Department of Biochemistry, Faculty of Pharmacy, Sivas Cumhuriyet University, Sivas, Türkiye*

<sup>b</sup>*Department of Chemistry, Sakarya University, Sakarya, Türkiye*

<sup>c</sup>*Department of Engineering Fundamental Sciences, Sakarya University of Applied Sciences, Sakarya, Türkiye*

<sup>d</sup>*Department of Biochemistry, Faculty of Pharmacy, Erciyes University, Kayseri, Türkiye*

\*Authors to whom correspondence should be addressed [Tel: +90(264)2957116; E-mail address: [abilgicli@sakarya.edu.tr](mailto:abilgicli@sakarya.edu.tr), [Cozsoya@gmail.com](mailto:Cozsoya@gmail.com)]

### Content of supporting information

- Fig. S1** FTIR spectra of novel synthesized phthalocyanines (2-7)
- Fig. S2** <sup>1</sup>H-NMR spectra of 3-(4-(3-oxobutyl)phenoxy)phthalonitrile (1)
- Fig. S3** <sup>1</sup>H-NMR spectra of ZnPc (2)
- Fig. S4** Mass spectrum of ZnPc (2)
- Fig. S5** Mass spectrum of CuPc (3)
- Fig. S6** Mass spectrum of MnPc (5)
- Fig. S7** Mass spectrum of GaPc (6)
- Fig. S8** Mass spectrum of InPc (7)
- Fig. S9** Electronic spectra of CuPc (3) at different concentration value in THF (inset: Q-band absorbance versus concentration).
- Fig. S10** Electronic spectra of CoPc (4) at different concentration value in THF (inset: Q-band absorbance versus concentration).
- Fig. S11** Electronic spectra of MnPc (5) at different concentration value in THF (inset: Q-band absorbance versus concentration).
- Fig. S12** Electronic spectra of GaPc (6) at different concentration value in THF (inset: Q-band absorbance versus concentration)
- Fig. S13** Electronic spectra of InPc (7) at different concentration value in THF (inset: Q-band absorbance versus concentration).
- Fig. S14** UV-Vis spectra of MnPc (5) at different pH values.

- Fig. S15** UV-Vis spectra of GaPc (**6**) at different pH values (inset: the change of Q-band and J-band absorbance versus pH value).
- Fig. S16** UV-Vis spectra of InPc (**6**) at different pH values
- Fig. S17** Absorption changes of GaPc (**6**) during the determination of singlet oxygen quantum yield in DMSO (inset: plot of DPBF absorbance vs. time).
- Fig. S18** Absorption changes of InPc (**7**) during the determination of singlet oxygen quantum yield in DMSO (inset: plot of DPBF absorbance vs. time).

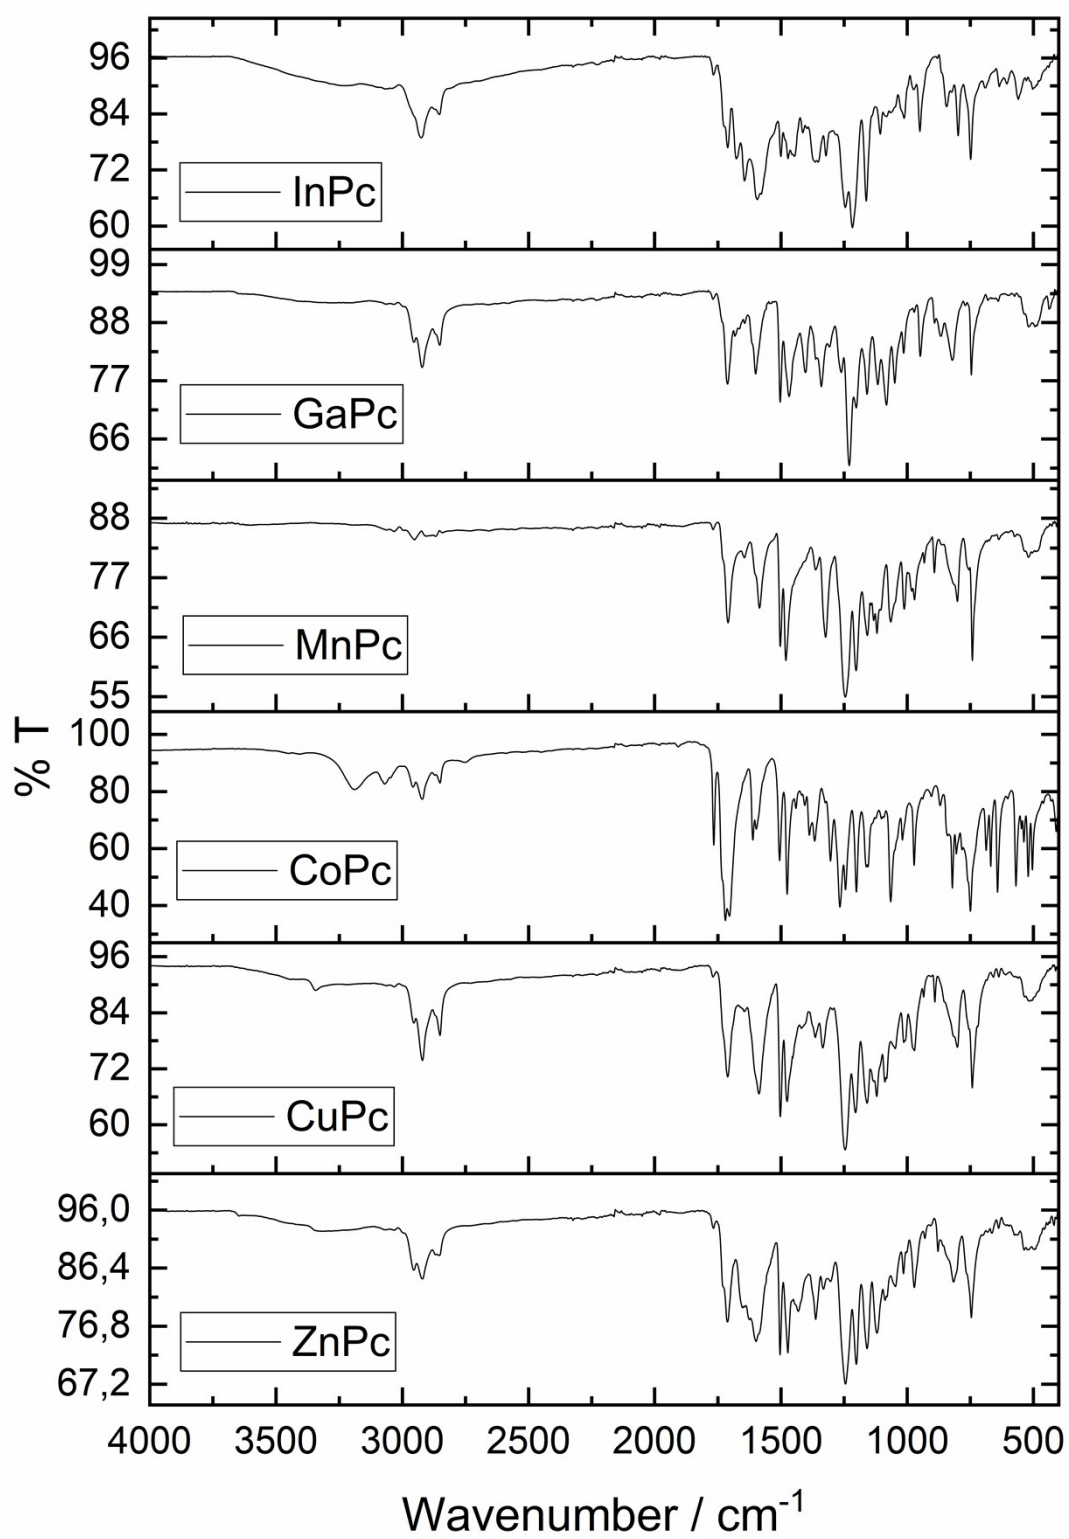

**Fig. S1** FTIR spectra of novel synthesized phthalocyanines (**2-7**)

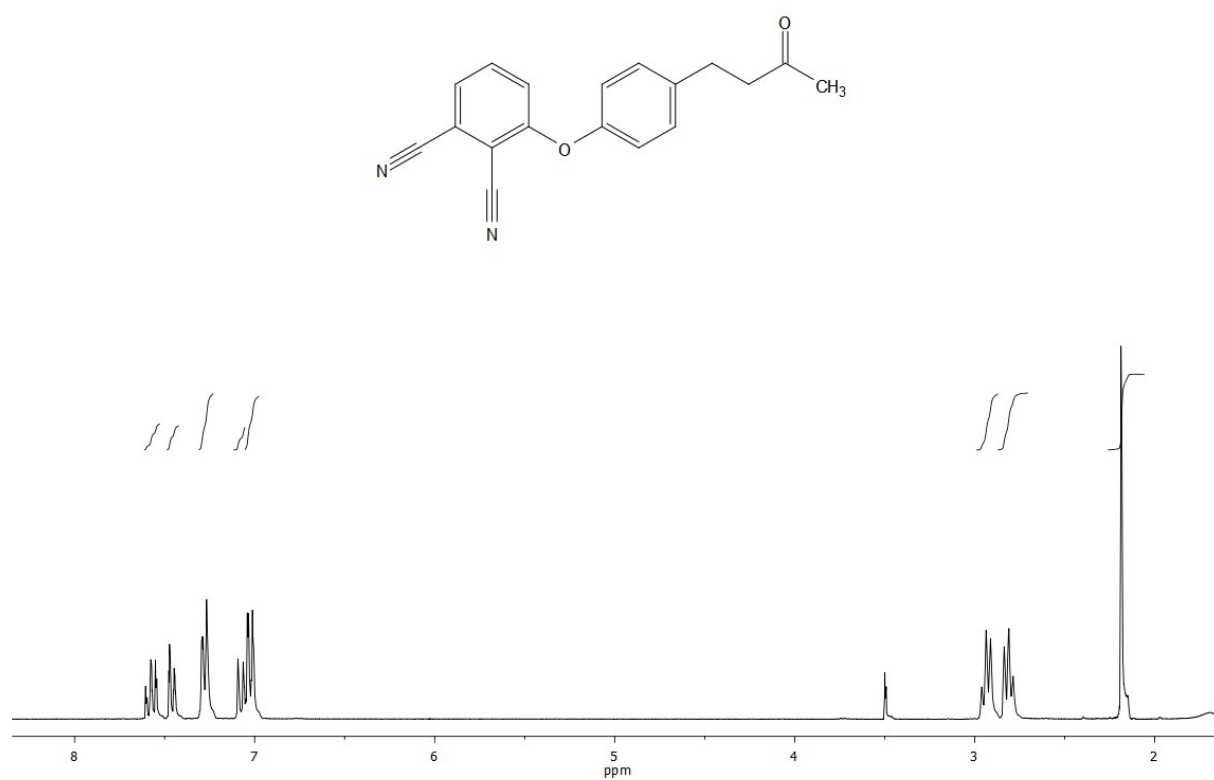

**Fig. S2** <sup>1</sup>H-NMR spectra of 3-(4-(3-oxobutyl)phenoxy)phthalonitrile (**1**)

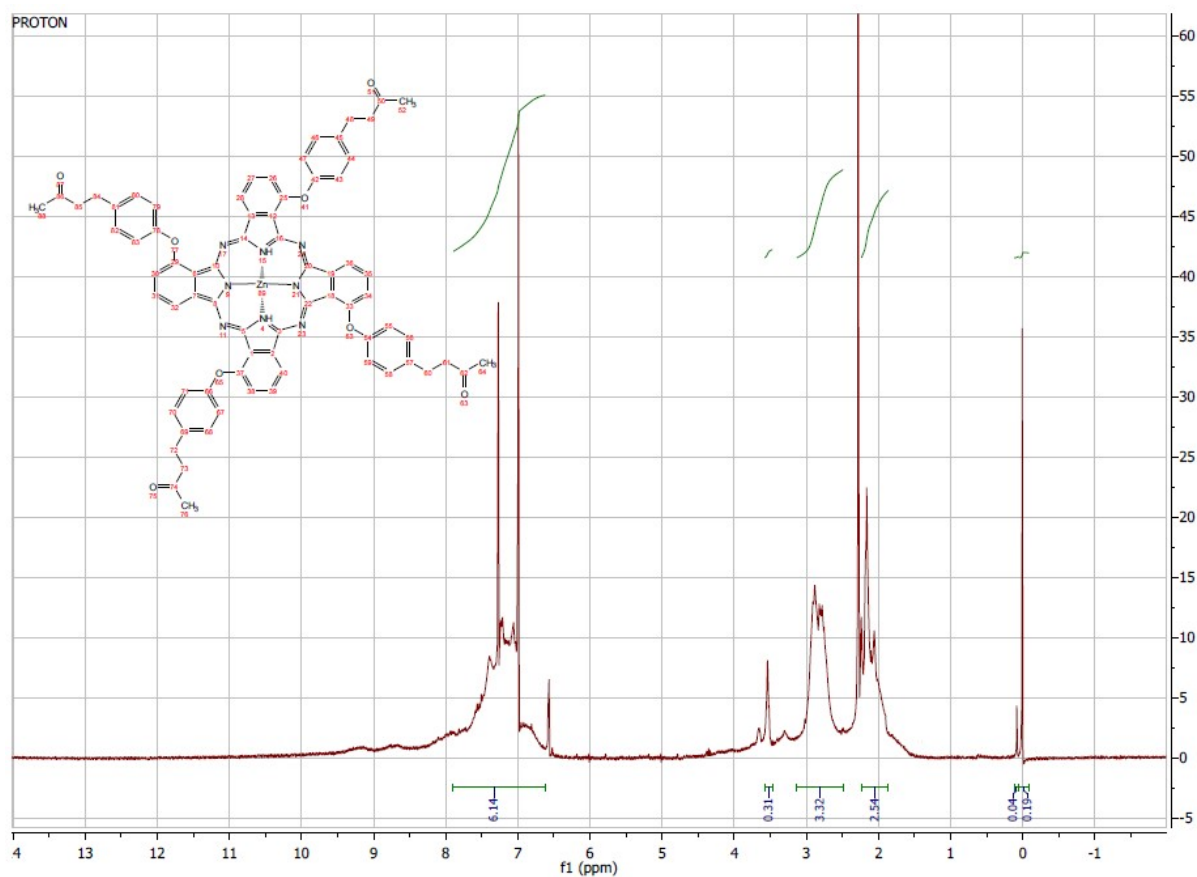

**Fig. S3**  $^1\text{H}$ -NMR spectra of ZnPc (2)

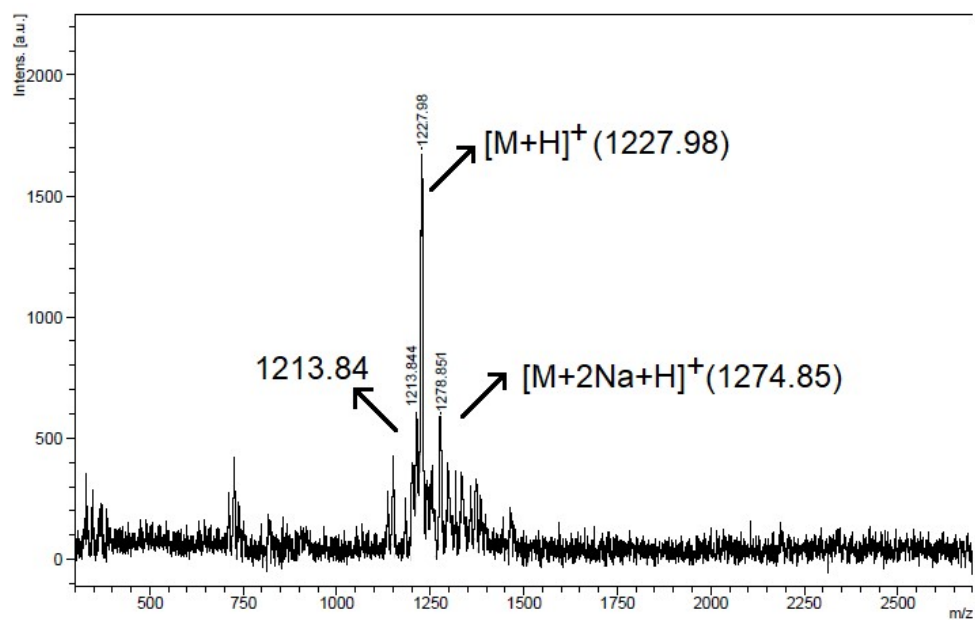

**Fig. S4** Mass spectrum of ZnPc (2)

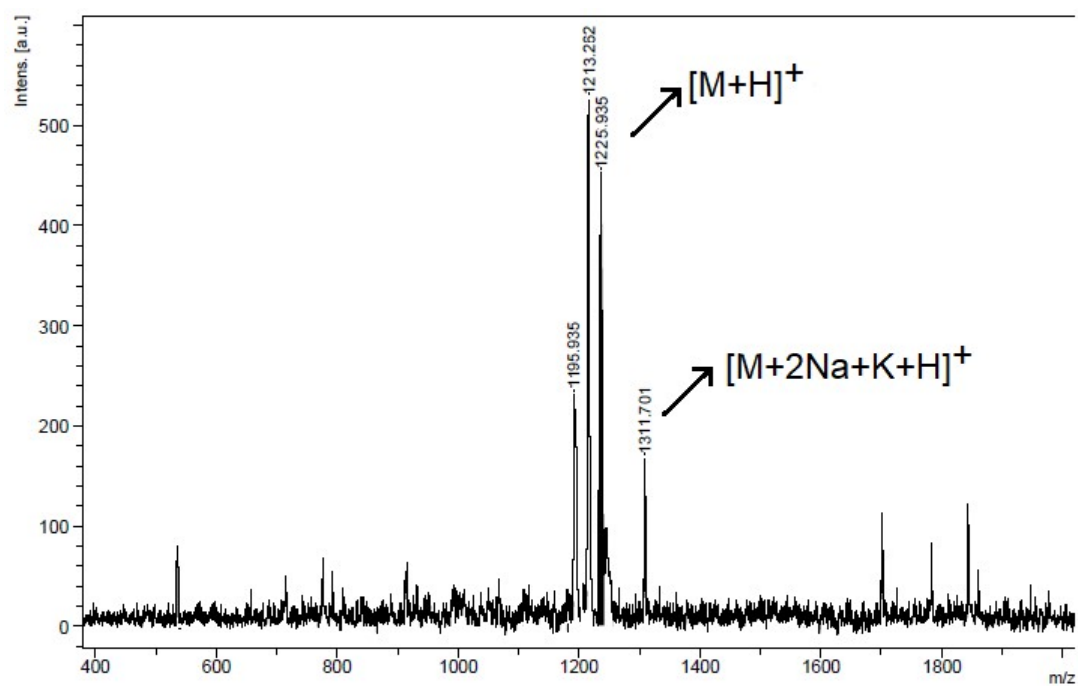

**Fig. S5** Mass spectrum of CuPc (3)

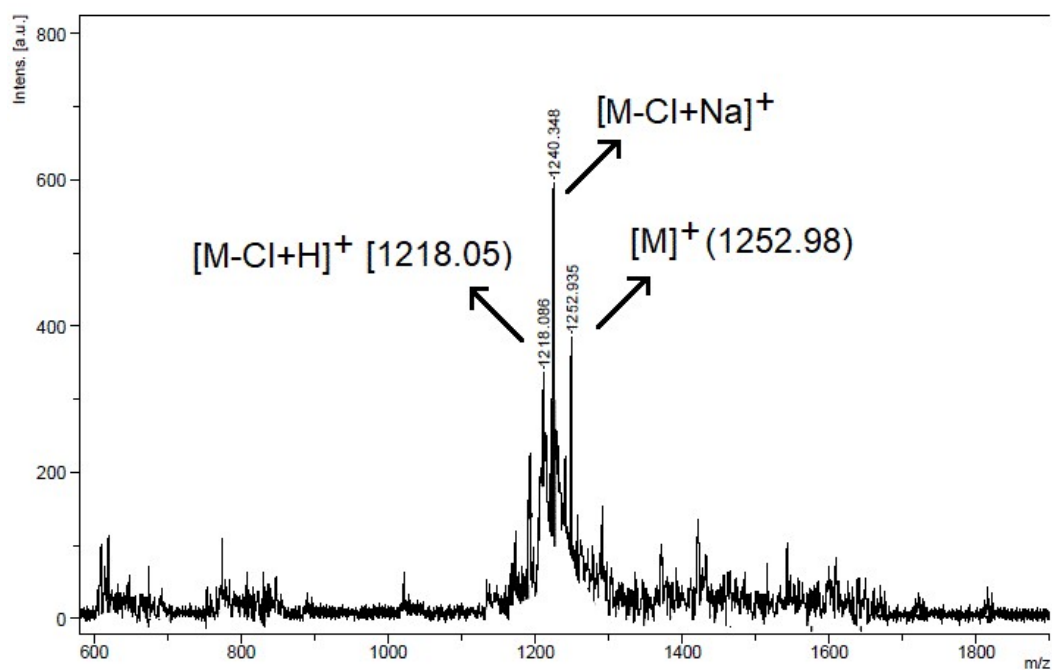

**Fig. S6** Mass spectrum of MnPc (5)

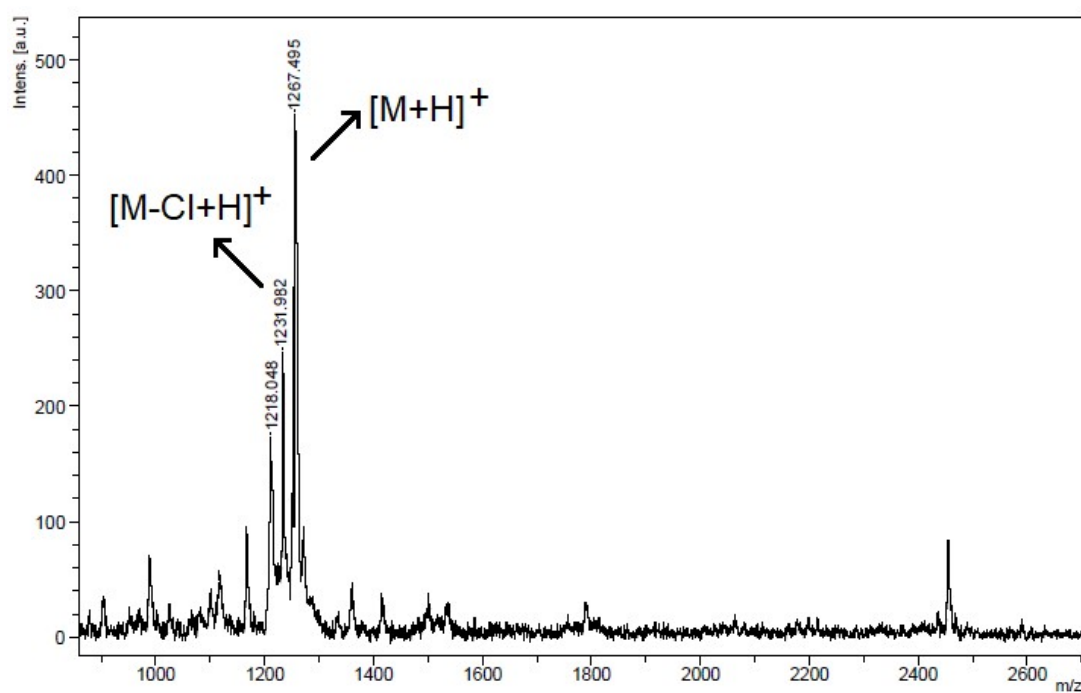

**Fig. S7** Mass spectrum of GaPc (6)

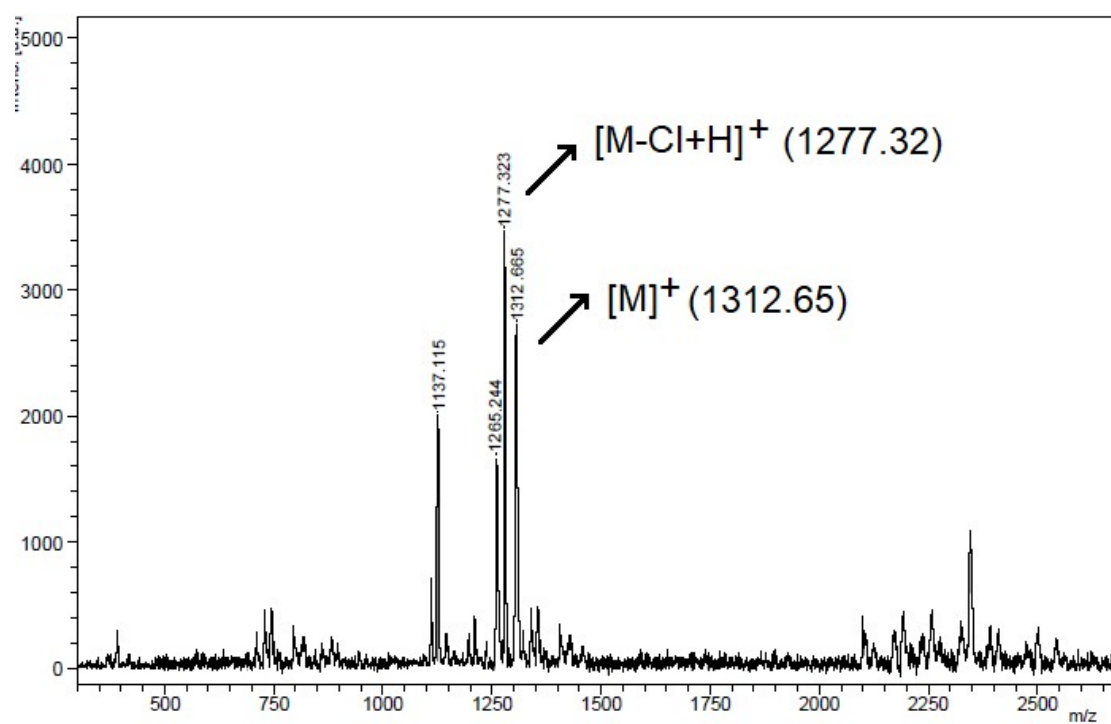

**Fig. S8** Mass spectrum of InPc (7)



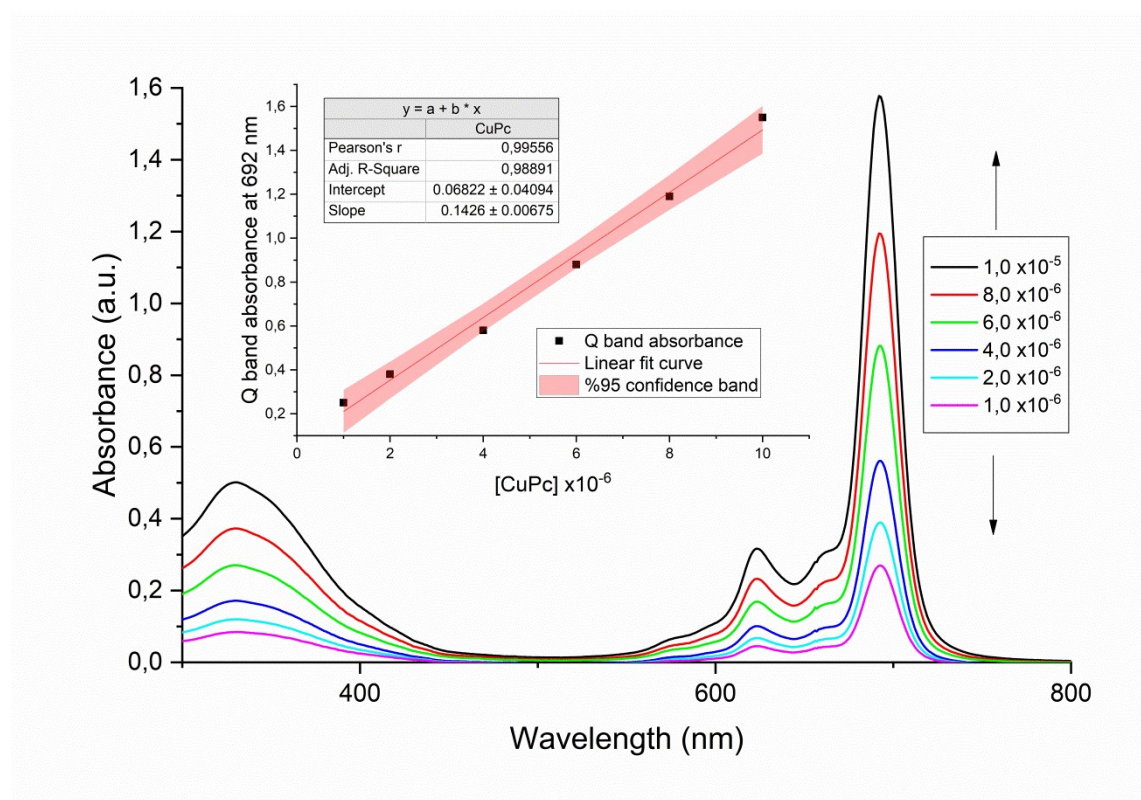

**Fig. S9** Electronic spectra of CuPc (**3**) at different concentration value in THF (inset: Q-band absorbance versus concentration).

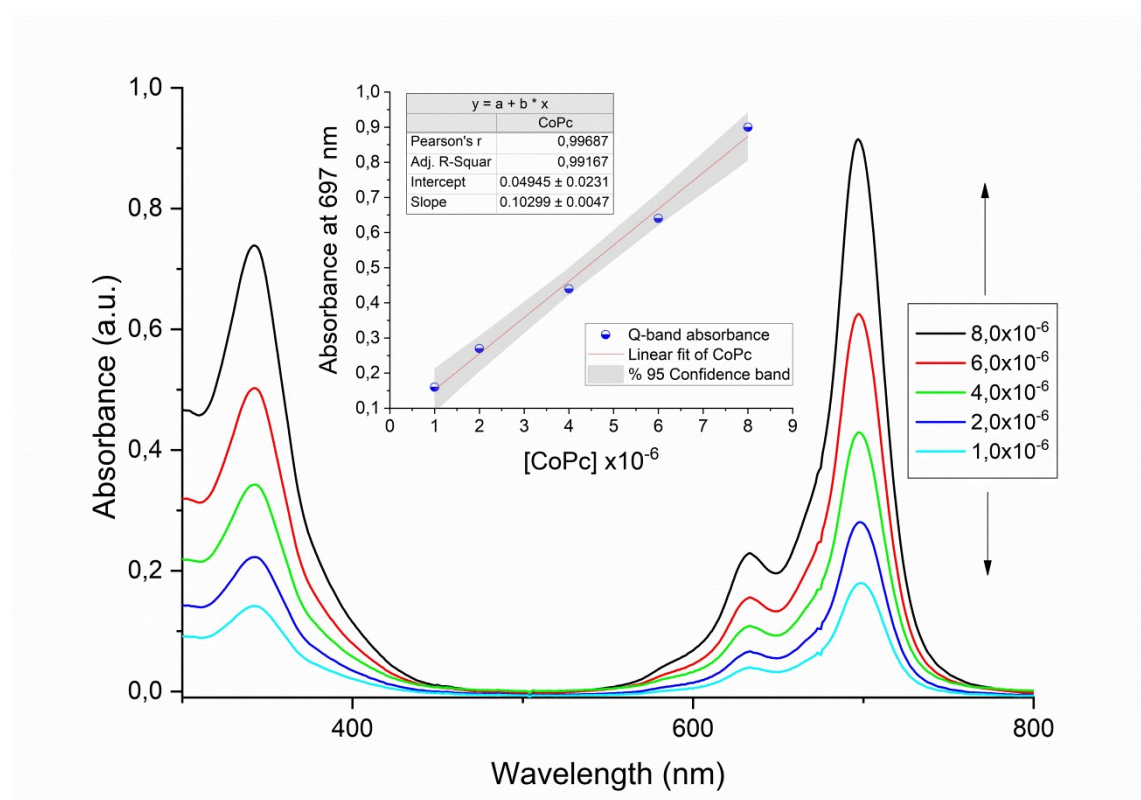

**Fig. S10** Electronic spectra of CoPc (**4**) at different concentration value in THF (inset: Q-band absorbance versus concentration).



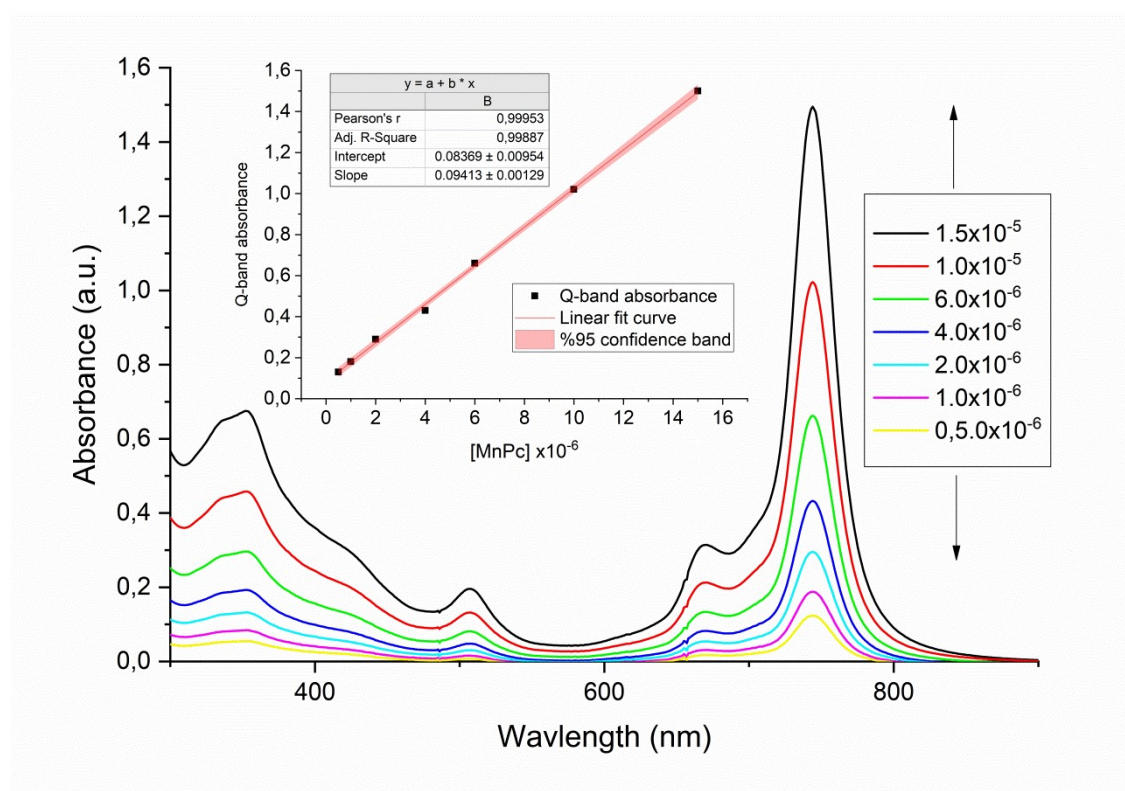

**Fig. S11** Electronic spectra of MnPc (**5**) at different concentration value in THF (inset: Q-band absorbance versus concentration).

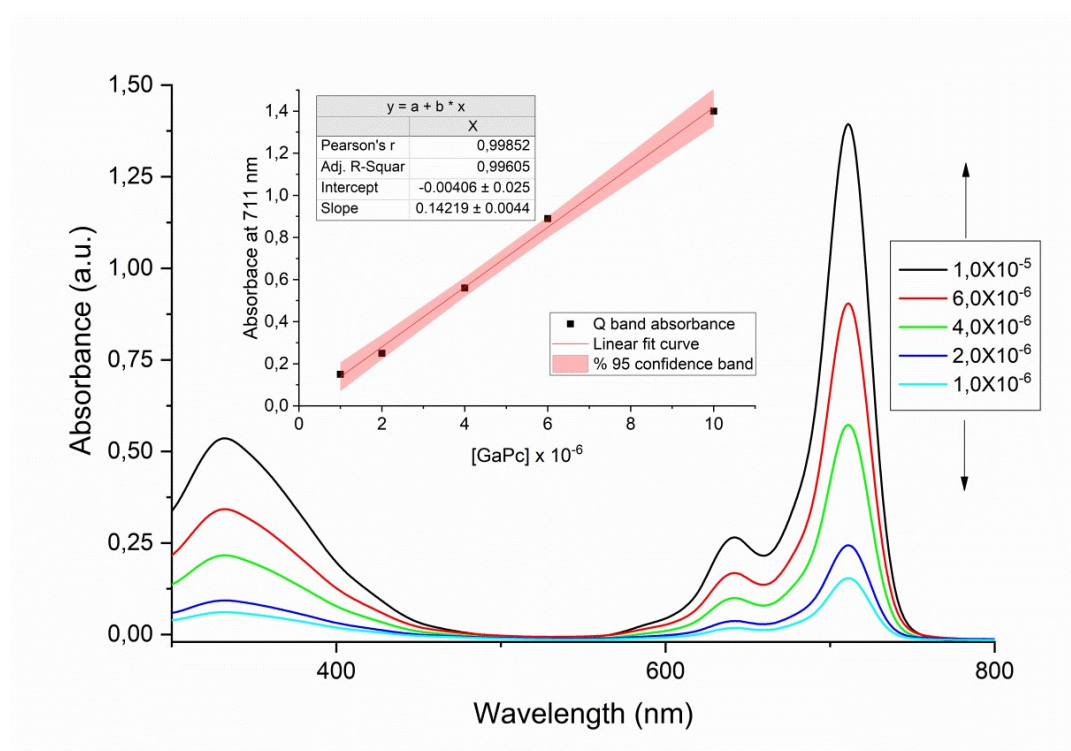

**Fig. S12** Electronic spectra of GaPc (**6**) at different concentration value in THF (inset: Q-band absorbance versus concentration)

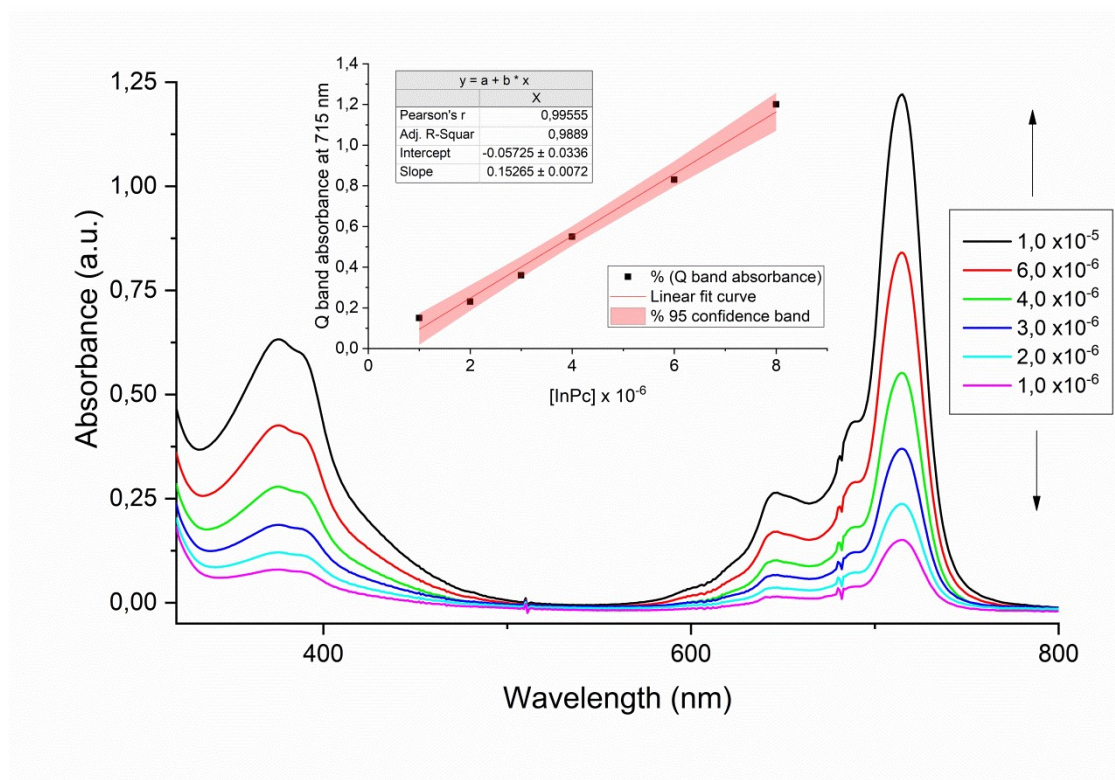

**Fig. S13** Electronic spectra of InPc (**7**) at different concentration value in THF (inset: Q-band absorbance versus concentration).

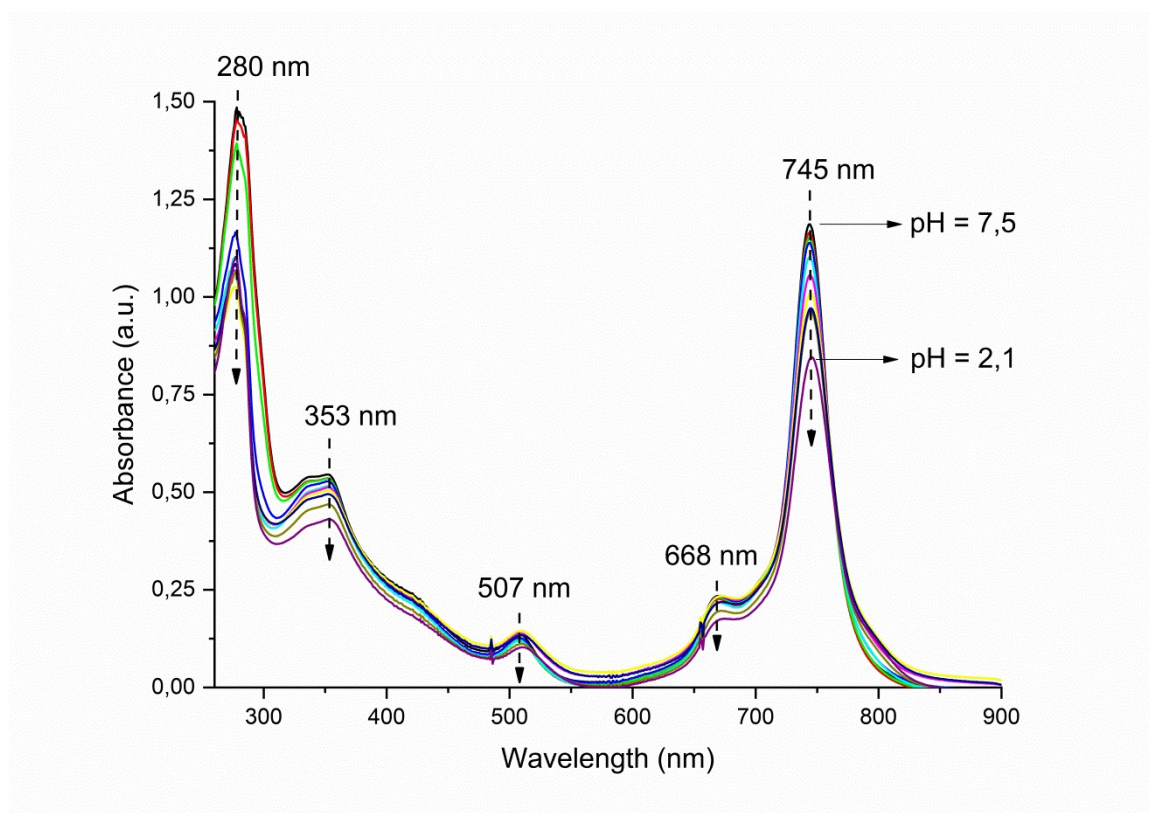

**Fig. S14** UV-Vis spectra of MnPc (**5**) at different pH values.



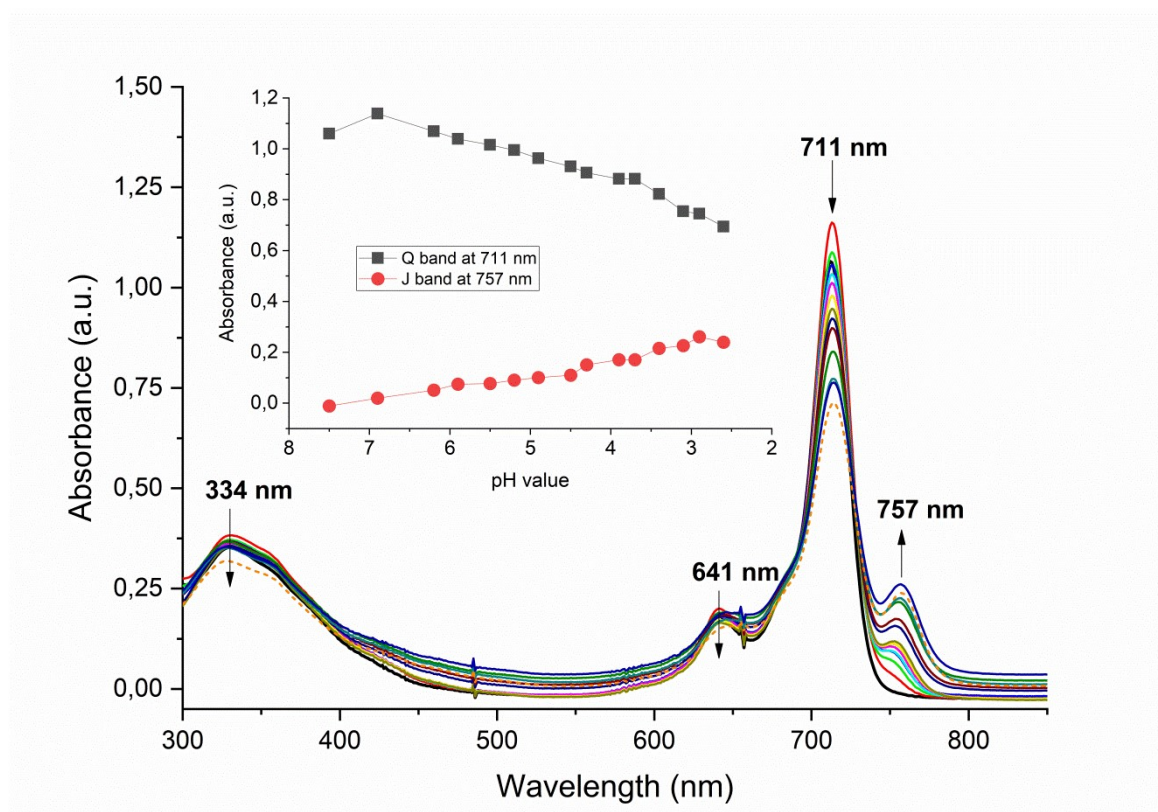

**Fig. S15** UV-Vis spectra of GaPc (**6**) at different pH values (inset: the change of Q-band and J-band absorbance versus pH value).

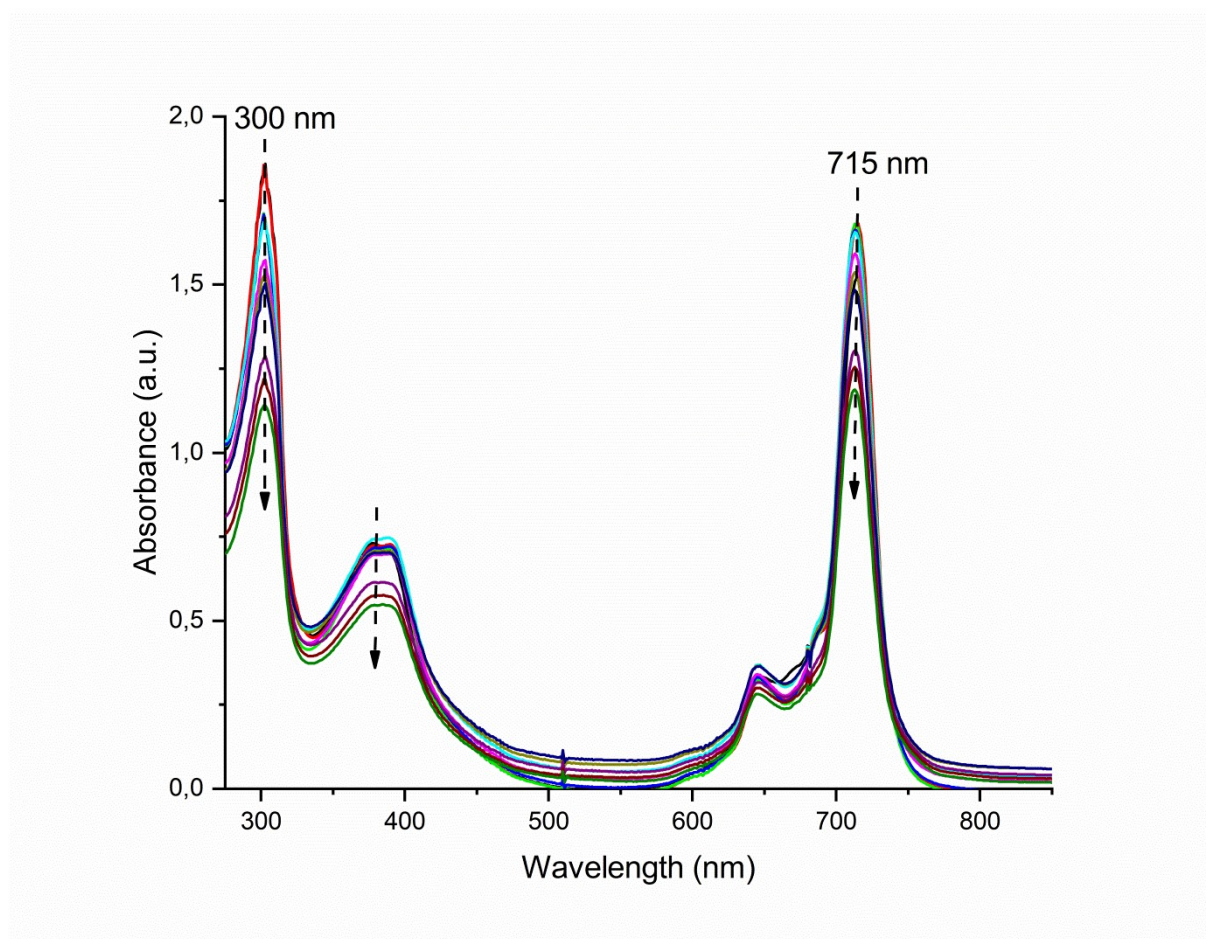

**Fig. S16** UV-Vis spectra of InPc (**6**) at different pH values

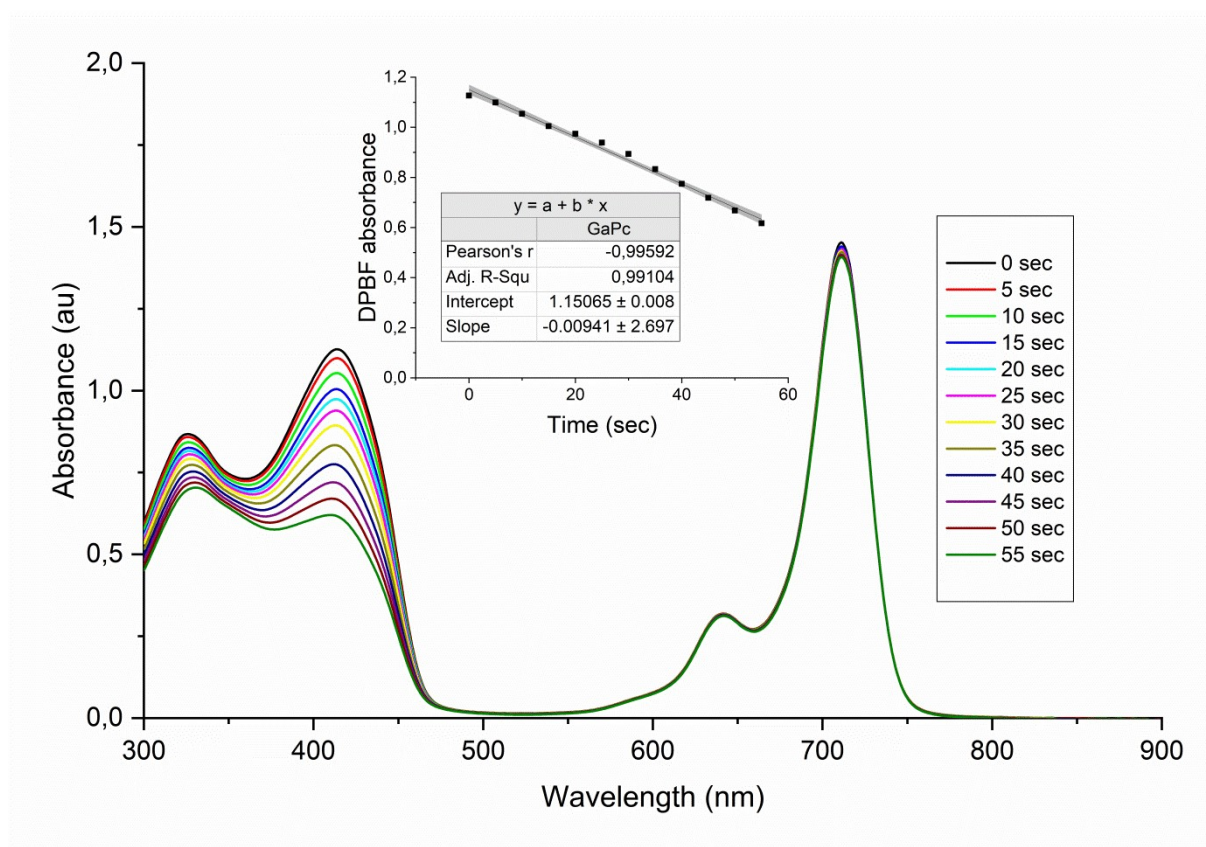

**Fig. S17** Absorption changes of GaPc (**6**) during the determination of singlet oxygen quantum yield in DMSO (inset: plot of DPBF absorbance vs. time).

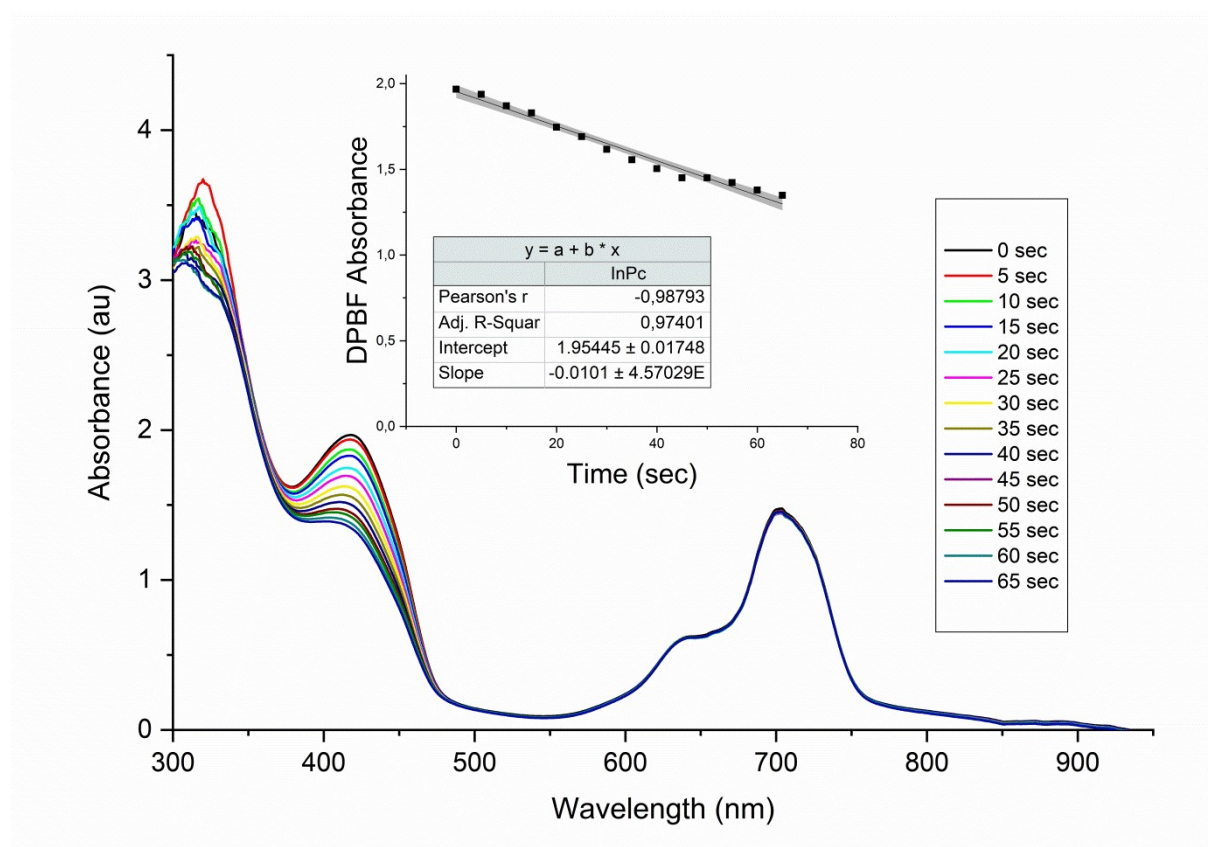

**Fig. S18** Absorption changes of InPc (**7**) during the determination of singlet oxygen quantum yield in DMSO (inset: plot of DPBF absorbance vs. time).
